# Supplementary material
Source: publisher site journal article supplement (https://www.dovepress.com/article/383231)
Supplement: Supplementary file 1 [file get_supplementary_file.php]

**Supplementary Table 1 Linear associations of the temporal peripapillary retinal nerve fiber layer sectors with the different birth weight percentile groups (n = 285) and other covariates**

|                                             | unadjusted <sup>#</sup> |       | multivariable <sup>*</sup> |       |
|---------------------------------------------|-------------------------|-------|----------------------------|-------|
|                                             | B [95% CI]              | p     | B [95% CI]                 | p     |
| <b>Temporal superior pRNFL [μm]</b>         |                         |       |                            |       |
| Gestational age (weeks)                     | 1.150 (-0.143; 2.442)   | 0.081 | 0.314 (-1.186; 1.815)      | 0.68  |
| Birth weight percentile (<3rd)              | -7.571 (-12.62; -2.524) | 0.003 | -8.311 (-14.03; -2.597)    | 0.004 |
| Birth weight percentile (3th - <10th)       | -3.910 (-10.53; 2.709)  | 0.25  | -6.294 (-13.06; 0.564)     | 0.072 |
| Birth weight percentile (10th – 90th; ref.) | Ref.                    | Ref.  | Ref.                       | Ref.  |
| Birth weight percentile (>90th-97th)        | 1.115 (-5.601; 7.831)   | 0.75  | -2.237 (-8.714; 4.239)     | 0.50  |
| Birth weight percentile (>97th)             | 1.879 (-3.330; 7.087)   | 0.48  | -0.106 (-5.655; 5.443)     | 0.97  |
| Placental insufficiency (yes)               | -4.849 (-13.42; 3.720)  | 0.27  | 0.116 (-8.224; 8.457)      | 0.98  |
| Preeclampsia (yes)                          | -5.081 (-10.44; 0.274)  | 0.063 | -2.581 (-8.401; -3.239)    | 0.39  |
| Breast feeding (yes)                        | 2.374 (-1.609; 6.303)   | 0.25  | 0.020 (-3.828; 3.868)      | 0.99  |
| <b>Temporal pRNFL [μm]</b>                  |                         |       |                            |       |
| Gestational age (weeks)                     | 1.087 (0.189; 1.984)    | 0.018 | 1.115 (0.074; 2.156)       | 0.036 |
| Birth weight percentile (<3rd)              | -1.958 (-5.443; 1.528)  | 0.27  | 0.092 (-4.327; 4.511)      | 0.97  |
| Birth weight percentile (3th - <10th)       | 0.435 (-4.032; 4.901)   | 0.85  | -0.605 (-5.238; 4.028)     | 0.80  |
| Birth weight percentile (10th – 90th; ref.) | Ref.                    | Ref.  | Ref.                       | Ref.  |
| Birth weight percentile (>90th-97th)        | 0.094 (-4.885; 5.073)   | 0.97  | -0.909 (-5.431; 3.613)     | 0.69  |
| Birth weight percentile (>97th)             | 2.221 (-2.724; 7.166)   | 0.38  | 1.888 (-3.090; 6.866)      | 0.46  |
| Placental insufficiency (yes)               | -3.999 (-9.305; 1.307)  | 0.14  | -5.006 (-10.50; 0.48)      | 0.074 |
| Preeclampsia (yes)                          | 0.113 (-4.508; 4.733)   | 0.96  | 1.604 (-3.162; 6.370)      | 0.51  |
| Breast feeding (yes)                        | -0.236 (-3.109; 2.638)  | 0.87  | -2.456 (-5.274; 0.362)     | 0.088 |
| <b>Temporal inferior pRNFL [μm]</b>         |                         |       |                            |       |
| Gestational age (weeks)                     | 0.996 (-0.414; 2.405)   | 0.17  | 0.678 (-1.061; 2.417)      | 0.45  |
| Birth weight percentile (<3rd)              | -8.270 (-14.34; -2.200) | 0.008 | -11.66 (-18.44; -4.883)    | 0.001 |
| Birth weight percentile (3th - <10th)       | -1.204 (-9.029; 6.620)  | 0.76  | -5.708 (-14.10; 2.687)     | 0.183 |
| Birth weight percentile (10th – 90th; ref.) | Ref.                    | Ref.  | Ref.                       | Ref.  |
| Birth weight percentile (>90th-97th)        | -2.099 (-9.280; 5.083)  | 0.57  | -5.897 (-13.10; 1.306)     | 0.11  |
| Birth weight percentile (>97th)             | -1.339 (-8.747; 6.068)  | 0.72  | -3.511 (-11.35; 4.325)     | 0.38  |
| Placental insufficiency (yes)               | 1.029 (-10.77; 12.83)   | 0.86  | 7.564 (-3.638; 18.77)      | 0.19  |
| Preeclampsia (yes)                          | -4.964 (-10.99; 1.065)  | 0.11  | -3.173 (-9.173; 2.828)     | 0.30  |
| Breast feeding (yes)                        | -0.251 (-5.023; 4.521)  | 0.92  | -1.924 (-6.770; 2.922)     | 0.44  |

**B – Beta; CI – Confidence interval; mm – millimeter**

**pRNFL – peripapillary retinal nerve fiber layer, B – Beta; CI – Confidence interval; μm – micrometer; Ref. - Reference**

**Linear regression analysis using generalized estimating equations to control for correlations between right and left eyes.**

**# Crude model without adjustment.**

**\* Model with the inclusion of gender (female), age (years), spherical equivalent (diopter), gestational age (weeks), birth weight percentile (<3rd); birth weight percentile (3th - <10th), birth weight percentile (10th – 90th; reference), birth weight percentile (>90th – 97th) and birth weight percentile (>97th), placental insufficiency (yes), preeclampsia (yes) and breastfeeding (yes).**

**Supplementary Table 2 Linear associations of the nasal peripapillary sectors with the different birth weight percentile groups (n = 285) and other covariates**

|                                             | unadjusted <sup>#</sup> |        | multivariable <sup>*</sup> |        |
|---------------------------------------------|-------------------------|--------|----------------------------|--------|
|                                             | B [95% CI]              | p      | B [95% CI]                 | p      |
| <b>Nasal superior pRNFL [µm]</b>            |                         |        |                            |        |
| Gestational age (weeks)                     | 0.267 (-1.150; 1.683)   | 0.71   | -0.776 (-2.456; 0.905)     | 0.37   |
| Birth weight percentile (<3rd)              | -4.998 (-10.51; 0.508)  | 0.075  | -9.859 (-16.80; -2.923)    | 0.005  |
| Birth weight percentile (3th - <10th)       | -9.585 (-14.97; -4.195) | <0.001 | -13.70 (-20.22; -7.172)    | <0.001 |
| Birth weight percentile (10th – 90th; ref.) | Ref.                    | Ref.   | Ref.                       | Ref.   |
| Birth weight percentile (>90th-97th)        | -3.109 (-8.846; 2.627)  | 0.29   | -6.830 (-12.99; -0.663)    | 0.030  |
| Birth weight percentile (>97th)             | 1.180 (-4.125; 6.486)   | 0.66   | -2.376 (-8.321; 3.596)     | 0.43   |
| Placental insufficiency (yes)               | -3.146 (-9.912; 3.621)  | 0.36   | -1.326 (-9.873; 7.221)     | 0.76   |
| Preeclampsia (yes)                          | 0.716 (-5.387; 6.819)   | 0.81   | 2.212 (-3.995; 8.418)      | 0.49   |
| Breast feeding (yes)                        | 2.540 (-1.856; 6.936)   | 0.26   | 1.116 (-3.414; 5.647)      | 0.63   |
| <b>Nasal pRNFL [µm]</b>                     |                         |        |                            |        |
| Gestational age (weeks)                     | 1.536 (0.522; 2.551)    | 0.003  | 0.542 (-0.596; 1.680)      | 0.35   |
| Birth weight percentile (<3rd)              | -9.515 (-13.55; -5.479) | <0.001 | -11.69 (-17.09; -6.293)    | <0.001 |
| Birth weight percentile (3th - <10th)       | -4.153 (-8.776; 0.470)  | 0.078  | -4.048 (-9.041; 0.944)     | 0.11   |
| Birth weight percentile (10th – 90th; ref.) | Ref.                    | Ref.   | Ref.                       | Ref.   |
| Birth weight percentile (>90th-97th)        | -1.177 (-4.947; 2.593)  | 0.54   | -2.789 (-6.738; 1.161)     | 0.17   |
| Birth weight percentile (>97th)             | 6.191 (1.811; 10.57)    | 0.006  | 2.518 (-2.304; 7.339)      | 0.31   |
| Placental insufficiency (yes)               | -0.689 (-11.58; 10.20)  | 0.90   | 7.760 (-4.166; 19.69)      | 0.20   |
| Preeclampsia (yes)                          | 3.049 (-1.954; 8.053)   | 0.23   | 3.103 (-2.168; 8.374)      | 0.25   |
| Breast feeding (yes)                        | 0.933 (-2.320; 4.186)   | 0.57   | 0.069 (-3.132; 3.296)      | 0.97   |
| <b>Nasal inferior pRNFL [µm]</b>            |                         |        |                            |        |
| Gestational age (weeks)                     | 0.665 (-1.138; 2.467)   | 0.47   | -1.324 (-3.305; 0.657)     | 0.19   |
| Birth weight percentile (<3rd)              | -11.24 (-19.17; -3.306) | 0.005  | -17.00 (-26.23; -7.773)    | <0.001 |
| Birth weight percentile (3th - <10th)       | -11.91 (-19.35; -4.471) | 0.002  | -13.94 (-22.03; -5.839)    | 0.001  |
| Birth weight percentile (10th – 90th; ref.) | Ref.                    | Ref.   | Ref.                       | Ref.   |
| Birth weight percentile (>90th-97th)        | -0.382 (-7.925; 7.162)  | 0.92   | -3.104 (-11.05; 4.838)     | 0.44   |
| Birth weight percentile (>97th)             | 6.666 (-0.553; 13.885)  | 0.070  | 3.115 (-5.190; 11.42)      | 0.46   |
| Placental insufficiency (yes)               | -2.906 (-18.11; 12.30)  | 0.71   | 6.538 (-10.35; 23.43)      | 0.45   |
| Preeclampsia (yes)                          | -0.547 (-9.658; 8.563)  | 0.91   | -0.088 (-9.468; 9.292)     | 0.99   |
| Breast feeding (yes)                        | 2.465 (-2.927; 7.857)   | 0.37   | 1.242 (-4.223; 6.707)      | 0.66   |

**pRNFL – peripapillary retinal nerve fiber layer, B – Beta; CI – Confidence interval; µm – micrometer; Ref. - Reference**

**Linear regression analysis using generalized estimating equations to control for correlations between right and left eyes.**

**# Crude model without adjustment.**

**\* Model with the inclusion of gender (female), age (years), spherical equivalent (diopter), gestational age (weeks), birth weight percentile (<3rd); birth weight percentile (3th - <10th), birth weight percentile (10th – 90th; reference), birth weight percentile (>90th-97th) and birth weight percentile (>97th), placental insufficiency (yes), preeclampsia (yes) and breastfeeding (yes).**
